1

2

**Prevalence of Social Anxiety Disorder and its associated**

3

**factors among Foreign-born Undergraduate Students in**

4

**Türkiye: A Cross-Sectional Study**

5

6

Lujain Alnemr<sup>1¶</sup>, Abdelaziz H. Salama<sup>1,2¶\*</sup>, Salma Abdelrazek<sup>1&</sup>, Hussein Alfakeer<sup>1&</sup>, Mohamed

7

Ali Alkhateeb<sup>1</sup>, Perihan Torun<sup>3</sup>

8

9

<sup>1</sup> Hamidiye International School of Medicine, University of Health Sciences, Istanbul, Türkiye

10

11

<sup>2</sup> School of Medicine, Johns Hopkins University, Maryland, United States of America

12

13

<sup>3</sup> Department of Public Health, Hamidiye International School of Medicine, University of Health Sciences, Istanbul, Türkiye

14

15

16

17

18

\*Corresponding author

19

20

E-mail: [asalama5@jh.edu](mailto:asalama5@jh.edu)

21

22

¶ These authors contributed equally to this work.

23

24

& These authors also contributed equally to this work.

25

26

## **Abstract**

27

Social anxiety disorder (SAD) is prevalent among university students, yet data on its

28

severity among foreign-born international undergraduate students in Türkiye remains

29

limited. This study aims to determine the prevalence of SAD and its associated factors

30

within this population. A cross-sectional study was conducted using a Google Form

31

survey distributed across various universities from September 17, 2023, to February 1,

32

2024. The survey comprised two sections: sociodemographic information and 17 items of

33 the Social Phobia Inventory (SPIN), which measures the frequency and intensity of social  
34 anxiety symptoms. Data analysis included descriptive statistics and inferential analysis,  
35 multiple regression, and binomial logistic regression. Out of 506 participants, 455 were  
36 included in the study. Results revealed that 39.1% exhibited no or very mild symptoms of  
37 SAD, while 23.7% experienced mild symptoms, 21.3% faced moderate symptoms, and  
38 11.6% and 4.2% presented with severe to very severe symptoms, respectively. Factors  
39 such as gender ( $p < 0.0001$ ), previous academic failures ( $p = 0.013$ ), family history of  
40 mental health issues ( $p = 0.009$ ), exercise frequency ( $p < 0.0001$ ), and perceptions of  
41 relationships with classmates ( $p < 0.0001$ ) were significantly associated with SAD.  
42 Females showed a higher probability of SAD compared to males (OR = 1.976).  
43 Individuals engaging in over 90 minutes of exercise per week were less likely to have  
44 SAD (OR = 0.383), and occasional smokers had a lower risk of SAD compared to non-  
45 smokers (OR = 0.422). Our study uncovered a notably elevated prevalence of Social  
46 Anxiety Disorder (SAD) among foreign-born undergraduate students in Türkiye. Factors  
47 such as being female, having a family history of mental illnesses, studying in a stressful  
48 environment, experiencing academic failure, and engaging in less frequent exercise were  
49 associated with noticeable symptoms of SAD. These findings emphasize the urgent need  
50 for heightened efforts in recognizing and addressing SAD within this population.

51

52

53

54

55

56

## 57 **Introduction**

58 Anxiety disorders are the most common group of mental illnesses in the world and the  
59 ninth most health-related cause of disability, according to the World Health Organization  
60 (WHO) [1,2]. Social Anxiety Disorder (SAD), also referred to as social phobia, is  
61 classified according to the Diagnostic and Statistical Manual of Mental Disorders V  
62 (DSM-V) as an anxiety disorder that presents with an intense fear of being in social  
63 situations where one may be under scrutiny by others [3]. SAD usually starts during late  
64 childhood and continues throughout life [4, 5]. People with SAD endure severe emotional  
65 and/or physical symptoms and may also show signs of shyness and discomfort when in  
66 social situations, even though they crave other people's company [6].

67

68 Long-term effects of SAD include low self-esteem, decreased quality of life, and  
69 academic underachievement [7-9]. Among university students, the prevalence of SAD is  
70 very prominent [10-14]. Moreover, enrolling in a university forces students to deal with  
71 new life experiences, such as adjusting to new life circumstances, engaging in university  
72 society, and fulfilling the demands of life. These factors are recognized to impact  
73 students' mental health and their participation in risky behaviors affecting their health,  
74 such as smoking, drinking alcohol, eating poorly, or being physically inactive [15].

75

76

77 Students seeking education abroad face significant difficulties adjusting due to the large  
78 variations in social and cultural norms [16]. They may experience emotional issues,  
79 including loss, separation, travel stress, social pressure, exacerbation of any underlying or  
80 hidden disorders,  
81 pharmaceutical complications, and unexpected situations [17,18]. These challenges may,  
82 therefore, result in anxiety, anorexia, and general avoidance of social interactions [19,20].

83 In a study done on Chinese international students, the researchers found that students  
84 faced challenges regarding language, academics, psycho-socio-cultural matters, finances,  
85 and political issues which had a negative impact on life satisfaction among the students  
86 [21]. Foreign-born students were found to face many difficulties in language and  
87 communication, and they can experience isolation and discrimination [22]. These results  
88 underline the importance of more research on the mental health of foreign students.  
89 Although studies worldwide assessed the prevalence of SAD in different populations,  
90 they did not give enough attention to population diversity, nor did they differentiate  
91 between foreign-born and non-foreign-born students.

92

93 The population of international students pursuing university education in Türkiye is  
94 steadily increasing. According to the latest update from the Council of Higher Education  
95 (YÖK) in 2023, it is estimated that there are 260,316 international undergraduate students  
96 in the country [23]. This indicates that Türkiye provides an excellent opportunity to reach  
97 a respectable number of foreign students from different backgrounds. Previous studies  
98 highlighted that SAD is already prevalent among Turkish university students [24,25].  
99 Furthermore, emotional, academic, and financial difficulties were determined to be the  
100 most prevalent concerns faced by Turkish students [26]. Another study conducted in  
101 2015 showed that particularly international students in Türkiye commonly experience  
102 psychosocial challenges such as being separated from their families, fear of making  
103 mistakes, feeling disappointed in their choice to study in Türkiye, social pressure,  
104 difficulty expressing thoughts, and struggling with criticism [27].

105 These various obstacles that international students face make them susceptible to mental  
106 health disorders. However, to our knowledge, no study has looked into the prevalence of  
107 SAD in this population. This study, therefore, aims to investigate the prevalence of SAD  
108 among foreign-born undergraduate students in Turkish universities and its associated  
109 factors.

110

## 111 **Methods**

### 112 **Study design**

113 This study employs a cross-sectional design, utilizing a self-administered questionnaire  
114 distributed to foreign-born undergraduate students in Türkiye via Google Forms. To  
115 reduce the possibility of non-response bias, we required that all questions be answered  
116 before submission. The survey, designed to maximize participation and guarantee  
117 anonymity, was conducted from September 17, 2023, to February 1, 2024. As there is no  
118 formal list representing international students in Turkish universities, we tried to reach  
119 international students from various universities through WhatsApp, Facebook, and  
120 Telegram groups that connect international students. Administrators of these groups were  
121 requested to send periodic reminders to enhance response rates. Additionally, we  
122 approached associations concerned with international students' affairs to promote the  
123 survey and send reminders about it.

124

### 125 **Sample size**

126 Based on the most recent data from the Council of Higher Education (YÖK), in 2023,  
127 there were 260,316 non-Turkish undergraduate students in Türkiye [23]. Utilizing  
128 EpiInfo 7.2.5.0, we determined the sample size required to represent this population.  
129 Considering a population size of 260,316, with  $p=0.21$  and  $q=0.79$ , along with a 95%  
130 confidence interval and a 5% margin of error, we calculated a minimum required sample  
131 size of 255 participants.

132

### 133 **Participants and survey**

134 The study included undergraduate students who are foreign-born non-Turkish, aged 18 or  
135 older and currently enrolled in Turkish universities. The survey is structured into two  
136 sections: the first part collects basic demographic and socioeconomic information,  
137 presented in both Arabic and English. The second part utilizes the Social Phobia  
138 Inventory (SPIN), a validated tool for evaluating symptoms of social anxiety and phobia.

139 The SPIN is administered in both its original English version and its validated Arabic  
140 translation, ensuring an accurate assessment of social anxiety symptoms among  
141 participants. The questionnaire was restricted to Arabic and English. This choice was  
142 driven by the notable representation of Arabic-speaking students in Türkiye, with five of  
143 the top 10 international student nationalities in Türkiye being Arabic-speaking [28].  
144 Additionally, the decision was influenced by the assumption that many students seeking  
145 education outside their home countries have sufficient English language skills to answer  
146 the questionnaire.

147

148 SPIN, with its 17 questions, measures the frequency and intensity of social anxiety  
149 symptoms over the preceding week. Responses are captured on a 5-point Likert scale  
150 from 0 (not at all) to 4 (extremely), allowing for a comprehensive symptom severity score  
151 ranging from 0 to 68. The scoring system classifies severity into five categories: none or  
152 very mild (less than 20), mild (21-30), moderate (31-40), severe (41-50), and very severe  
153 (51 or more), enabling detailed analysis of social anxiety levels among the surveyed  
154 population.

155

## 156 **Quality of measure**

157 The Social Phobia Inventory (SPIN), originally developed in English by Connor et al.  
158 (2000) [29], has undergone successful translation and validation into Arabic by Sfeir et  
159 al. (2022) [30]. The Arabic version has demonstrated high reliability and validity for  
160 evaluating social anxiety symptoms among Arabic-speaking populations. In two separate  
161 ways, the Arabic SPIN exhibited Cronbach's alpha values of 0.92 and 0.90, indicating  
162 strong internal consistency comparable to the original scale. Moreover, its convergent  
163 validity and gender-invariant measurement of social phobia further confirm its efficacy.  
164 Consequently, the Arabic SPIN emerges as a robust tool for detecting social phobia in  
165 Arabic-speaking individuals.

166

## 167 **Statistical analysis**

168 The statistical analysis of this study encompasses descriptive, inferential analysis,  
169 multiple regression, and logistic regression. Initially, descriptive statistics, including  
170 frequencies and percentages, will outline the participant characteristics of  
171 sociodemographic and academic data. The Shapiro-Wilk test assesses the normality of  
172 the Social Phobia Inventory (SPIN) scores. For non-normally distributed data, the Mann-  
173 Whitney U and Kruskal-Wallis H tests will examine differences in SPIN scores across  
174 demographic variables. Associations between demographic factors and SPIN categories  
175 (ranging from “None or Very Mild” to “Very Severe”) will be explored using the non-  
176 parametric chi-square test.

177 Further, multiple regression analysis will predict SPIN scores (Ranging from “0” to  
178 “68”) based on variables such as gender, smoking status, previous failures in university,  
179 family history of mental health issues, exercise habits, and classmate relationships.  
180 Additionally, a binomial logistic regression will evaluate the impact of various  
181 demographic factors, including gender, monthly budget, smoking status, field of study,  
182 GPA, family history, Turkish language proficiency, living arrangements, exercise habits,  
183 and classmate relationships, on the presence of social phobia, dichotomized into  
184 “Absent” (No or very mild SPIN) and “Present” (Mild to very severe SPIN). All  
185 statistical analyses will be conducted using IBM’s SPSS Statistics package for Windows  
186 (Version 25.0).

187

## 188 **Ethical approval**

189 Prior to commencing the cross-sectional study, the research team obtained ethical  
190 approval from the Hamidiye Scientific Research Ethics Committee [31]. Participants  
191 were briefed on the study's aims and objectives, and digital consent was obtained from  
192 them before they completed the survey. Consent was indicated by participants selecting a  
193 designated checkbox.

194

195

## 196 **Results**

### 197 **Participant characteristics**

198 We initially collected 506 responses but narrowed them down to 455 eligible participants  
199 after excluding those who did not meet the undergraduate criterion (37 respondents), one  
200 due to Turkish nationality, and 13 for incomplete surveys. The majority of participants  
201 were Syrian students (59.6%); second to them were Egyptian students at 11.4%. Gender  
202 distribution was nearly balanced (47.9% females, 52.1% males), and over half were aged  
203 18–21 (52.1%). Most were single (94.1%), reported an average monthly budget (48.1%),  
204 and were majoring in medical sciences (45.9%). The social classmate environment was  
205 predominantly described as friendly and relaxed (56.3%). The significant majority  
206 reported being non-smokers (85.7%) and abstaining from alcohol (97.6%). Living  
207 arrangements varied, with 39.6% residing with their parents. **(Table 1).**

| <b>Table 1, Participants Characteristics</b> |               | n (%)     |
|----------------------------------------------|---------------|-----------|
| <b>Age</b>                                   | 18-21         | 237(52.1) |
|                                              | 22-25         | 181(39.8) |
|                                              | 30-34         | 27(5.9)   |
|                                              | 35 or above   | 10(2.2)   |
|                                              | Total         | 455(100)  |
| <b>Gender</b>                                | Female        | 218(47.9) |
|                                              | Male          | 237(52.1) |
|                                              | Total         | 455(100)  |
| <b>Marital status</b>                        | Single        | 428(94.1) |
|                                              | Married       | 24(5.3)   |
|                                              | Widowed       | 1(0.2)    |
|                                              | Divorced      | 2(0.4)    |
|                                              | Total         | 455(100)  |
| <b>Monthly budget</b>                        | Low           | 122(26.8) |
|                                              | Average       | 219(48.1) |
|                                              | Above average | 49(10.8)  |
|                                              | Very low      | 61(13.4)  |
|                                              | High          | 4(0.9)    |
|                                              | Total         | 455(100)  |
| <b>Do you smoke?</b>                         | No            | 390(85.7) |
|                                              | Occasionally  | 33(7.3)   |
|                                              | Daily         | 32(7)     |



|                                                                          |                                     |           |
|--------------------------------------------------------------------------|-------------------------------------|-----------|
|                                                                          | Total                               | 455(100)  |
| <b>Do you drink alcoholic drinks?</b>                                    | No                                  | 444(97.6) |
|                                                                          | Occasionally                        | 11(2.4)   |
|                                                                          | Daily                               | 0         |
|                                                                          | Total                               | 455(100)  |
| <b>What is the type of your university?</b>                              | Government                          | 359(78.9) |
|                                                                          | Foundation / Private                | 96(21.1)  |
|                                                                          | Total                               | 455(100)  |
| <b>Which subject are you currently studying?</b>                         | Medical Field                       | 209(45.9) |
|                                                                          | Engineering                         | 165(36.3) |
|                                                                          | Social Sciences                     | 72(15.8)  |
|                                                                          | Natural Sciences                    | 8(1.8)    |
|                                                                          | Total                               | 454(99.8) |
|                                                                          | Missing data                        | 1(0.2)    |
| <b>What is your current academic year in school?</b>                     | Preschool                           | 10(2.2)   |
|                                                                          | Year1                               | 97(21.3)  |
|                                                                          | Year2                               | 127(27.9) |
|                                                                          | Year3                               | 98(21.5)  |
|                                                                          | Year4                               | 96(21.1)  |
|                                                                          | Year5                               | 26(5.7)   |
|                                                                          | Year6                               | 1(0.2)    |
|                                                                          | Total                               | 455(100)  |
| <b>What is your most recent GPA</b>                                      | Less than 2.5                       | 118(25.9) |
|                                                                          | 2.5-2.9                             | 170(37.4) |
|                                                                          | 3.0-3.4                             | 118(25.9) |
|                                                                          | 3.5-4.0                             | 49(10.8)  |
|                                                                          | Total                               | 455(100)  |
| <b>Have you previously failed a year in college?</b>                     | No, I have not failed a year.       | 373(82)   |
|                                                                          | Yes, I have failed a year / years.  | 82(18)    |
|                                                                          | Total                               | 455(100)  |
| <b>Do you have Family history of mental issues?</b>                      | No, we don't.                       | 380(83.5) |
|                                                                          | Yes, we have.                       | 75(16.5)  |
|                                                                          | Total                               | 455(100)  |
| <b>Do you use psychiatric medication?</b>                                | No, I don't.                        | 415(91.2) |
|                                                                          | Yes, I do.                          | 40(8.8)   |
|                                                                          | Total                               | 455(100)  |
| <b>What do you think is your level of Turkish language?</b>              | Poor                                | 29(6.4)   |
|                                                                          | Fair                                | 79(17.4)  |
|                                                                          | Good                                | 175(38.5) |
|                                                                          | Very good                           | 172(37.8) |
|                                                                          | Total                               | 455(100)  |
| <b>At present whom do you live with?</b>                                 | Alone                               | 43(9.5)   |
|                                                                          | With Parents                        | 180(39.6) |
|                                                                          | With housemates                     | 90(19.8)  |
|                                                                          | With relatives                      | 11(2.4)   |
|                                                                          | In a dormitory                      | 131(28.8) |
|                                                                          | Total                               | 455(100)  |
| <b>Do you exercise?</b>                                                  | No                                  | 144(31.6) |
|                                                                          | Yes, occasionally.                  | 190(41.8) |
|                                                                          | Yes, less than 90 minutes per week. | 27(5.9)   |
|                                                                          | Yes, more than 90 minutes per week. | 94(20.7)  |
|                                                                          | Total                               | 455(100)  |
| <b>How would you define the climate between you and your classmates?</b> | Friendly and relaxed.               | 256(56.3) |
|                                                                          | Competitive and stimulating         | 32(7.0)   |
|                                                                          | Competitive and hostile             | 29(6.4)   |

|  |                              |           |
|--|------------------------------|-----------|
|  | I don't have an opinion yet. | 124(27.3) |
|  | I don't have friends.        | 13(2.9)   |
|  | Total                        | 454(99.8) |
|  | Missing                      | 1(0.2)    |

208

## 209 Prevalence of social phobia

210 The study reveals the prevalence of social phobia among participants as follows: 39.1%  
 211 exhibited “no or very mild symptoms,” 23.7% experienced “mild symptoms,” 21.3%  
 212 faced “moderate symptoms,” while “Severe” to “very severe symptoms” were present in  
 213 11.6% and 4.2% of participants, respectively. This distribution underscores the varying  
 214 degrees of social anxiety’s impact on individuals (**Fig 1**).

215

### 216 Fig 1. Prevalence of SPIN categories

## 217 Factors associated with social anxiety disorder (SAD)

218 The inferential analysis yielded significant findings related to SAD. Gender showed  
 219 statistical significance in both group difference and association tests ( $p < 0.0001$ ). Family  
 220 history of mental health issues was significant in both group difference tests ( $p = 0.001$ )  
 221 and association tests ( $p = 0.009$ ). Exercise habits were also significant in both tests ( $p <$   
 222  $0.0001$ ), as were the type of relationship with classmates ( $p < 0.0001$ ). Smoking status  
 223 demonstrated statistical significance only in the group difference test ( $p = 0.028$ ), and  
 224 prior academic failure was significant only in the association test ( $p = 0.013$ ).  
 225 Several factors did not show a statistically significant association with SAD, including  
 226 age, marital status, monthly budget, alcohol consumption, type of university, subject of  
 227 study, recent GPA, psychiatric medication usage, level of Turkish language proficiency,  
 228 and living arrangements (**Table 2**).

229

**Table 2, Factors associated with Social Anxiety Disorder (SAD).**

|  | SPIN Score. | Group Difference Test | Association Test |
|--|-------------|-----------------------|------------------|
|  | N (%)       |                       |                  |
|  | 455(100)    | Mean (SD)             | <i>P-value</i>   |
|  |             |                       | <i>P-value</i>   |

|                                                      |                       |           |              |          |          |
|------------------------------------------------------|-----------------------|-----------|--------------|----------|----------|
| <b>Age</b>                                           | 18-21                 | 237(52.1) | 26.3(14)     | 0.56     | 0.61     |
|                                                      | 22-25                 | 181(39.8) | 25.6(13.2)   |          |          |
|                                                      | 30-34                 | 27(5.9)   | 24.9(15.9)   |          |          |
|                                                      | 35 or above           | 10(2.2)   | 20.4(15.14)  |          |          |
|                                                      | Total                 | 455(100)  |              |          |          |
| <b>Gender</b>                                        | Female                | 218(47.9) | 28.89(14.27) | <0.0001* | <0.0001* |
|                                                      | Male                  | 237(52.1) | 22.96(12.82) |          |          |
|                                                      | Total                 | 455(100)  |              |          |          |
| <b>Marital status</b>                                | Single                | 428(94.1) | 26(13.8)     | 0.651    | 0.575    |
|                                                      | Married               | 24(5.3)   | 23.2(13.7)   |          |          |
|                                                      | Widowed               | 1(.2)     |              |          |          |
|                                                      | Divorced              | 2(.4)     | 20(28.3)     |          |          |
|                                                      | Total                 | 455(100)  |              |          |          |
| <b>Monthly budget</b>                                | Low                   | 122(26.8) | 27.7(13.5)   | 0.646    | 0.799    |
|                                                      | Average               | 219(48.1) | 26.2(14)     |          |          |
|                                                      | Above average         | 49(10.8)  | 25.36(13.84) |          |          |
|                                                      | Very low              | 61(13.4)  | 24.5 (13.58) |          |          |
|                                                      | High                  | 4(.9)     | 23(20.34)    |          |          |
|                                                      | Total                 | 455(100)  |              |          |          |
| <b>Do you smoke?</b>                                 | No Smoker             | 390(85.7) | 26.25(13.77) | 0.028*   | 0.461    |
|                                                      | Smoker (Occasionally) | 33(7.3)   | 19.48(14.25) |          |          |
|                                                      | Smoker (Daily)        | 32(7)     | 26.84(13.07) |          |          |
|                                                      | Total                 | 455(100)  |              |          |          |
| <b>Do you drink alcoholic drinks?</b>                | No                    | 444(97.6) | 26(13.8)     | 0.134    | 0.446    |
|                                                      | Occasionally          | 11(2.4)   | 19(13.17)    |          |          |
|                                                      | Daily                 | 0         |              |          |          |
|                                                      | Total                 | 455(100)  |              |          |          |
| <b>What is the type of your university?</b>          | Government            | 359(78.9) | 25.5(14)     | 0.439    | 0.207    |
|                                                      | Foundation / Private  | 96(21.1)  | 26.72(13.4)  |          |          |
|                                                      | Total                 | 455(100)  |              |          |          |
| <b>Which subject are you currently studying?</b>     | Medical Field         | 209(45.9) | 26.7(14)     | 0.104    | 0.164    |
|                                                      | Engineering           | 165(36.3) | 26.34(13.3)  |          |          |
|                                                      | Social Sciences       | 72(15.8)  | 25.46(14.24) |          |          |
|                                                      | Natural Sciences      | 8(1.8)    | 22.45(14.5)  |          |          |
|                                                      | Total                 | 454(99.8) |              |          |          |
|                                                      | Missing data          | 1(0.2)    |              |          |          |
| <b>What is your current academic year in school?</b> | Preschool             | 10(2.2)   | 24.9 (17)    | 0.594    | 0.119    |
|                                                      | Year1                 | 97(21.3)  | 25.3 (15)    |          |          |
|                                                      | Year2                 | 127(27.9) | 25.3(14)     |          |          |
|                                                      | Year3                 | 98(21.5)  | 28.4(13.6)   |          |          |
|                                                      | Year4                 | 96(21.1)  | 24.5(11.7)   |          |          |
|                                                      | Year5                 | 26(5.7)   | 25.6(15.3)   |          |          |
|                                                      | Year6                 | 1(0.2)    |              |          |          |
|                                                      | Total                 | 455(100)  |              |          |          |

|                                                                          |                                     |           |              |          |          |
|--------------------------------------------------------------------------|-------------------------------------|-----------|--------------|----------|----------|
| <b>What is your most recent GPA?</b>                                     | Less than 2.5                       | 118(25.9) | 26.8(13.9)   | 0.399    | 0.374    |
|                                                                          | 2.5-2.9                             | 170(37.4) | 26 (13.3)    |          |          |
|                                                                          | 3.0-3.4                             | 118(25.9) | 25.5 (14.24) |          |          |
|                                                                          | 3.5-4.0                             | 49(10.8)  | 22.45 (14.5) |          |          |
|                                                                          | Total                               | 455(100)  |              |          |          |
| <b>Have you previously failed a year in college?</b>                     | No, I have not failed a year.       | 373(82)   | 25.38(14.2)  | 0.103    | 0.013*   |
|                                                                          | Yes, I have failed a year/ years.   | 82(18)    | 27.7(12)     |          |          |
|                                                                          | Total                               | 455(100)  |              |          |          |
| <b>Do you have Family history of mental issues?</b>                      | No, we don't.                       | 380(83.5) | 24.8(13.5)   | 0.001*   | 0.009*   |
|                                                                          | Yes, we have.                       | 75(16.5)  | 30.8(14.4)   |          |          |
|                                                                          | Total                               | 455(100)  |              |          |          |
| <b>Do you use psychiatric medication?</b>                                | No, I don't.                        | 415(91.2) | 25.5 (13.4)  | 0.213    | 0.124    |
|                                                                          | Yes, I do.                          | 40(8.8)   | 28.8 (17.4)  |          |          |
|                                                                          | Total                               | 455(100)  |              |          |          |
| <b>What do you think is your level of Turkish language?</b>              | Poor                                | 29(6.4)   | 25.9(14)     | 0.0524   | 0.260    |
|                                                                          | Fair                                | 79(17.4)  | 27.5(15.2)   |          |          |
|                                                                          | Good                                | 175(38.5) | 27.4(13.4)   |          |          |
|                                                                          | Very good                           | 172(37.8) | 23.4(13.4)   |          |          |
|                                                                          | Total                               | 455(100)  |              |          |          |
| <b>At present who do you live with?</b>                                  | Alone                               | 43(9.5)   | 24 (14.8)    | 0.881    | 0.909    |
|                                                                          | With Parents                        | 180(39.6) | 26.2 (13.4)  |          |          |
|                                                                          | With housemates                     | 90(19.8)  | 25.6 (13.7)  |          |          |
|                                                                          | With relatives                      | 11(2.4)   | 24.3 (13.7)  |          |          |
|                                                                          | In a dormitory                      | 131(28.8) | 26.1 (14.4)  |          |          |
|                                                                          | Total                               | 455(100)  |              |          |          |
| <b>Do you exercise?</b>                                                  | No                                  | 144(31.6) | 30.5(13.8)   | <0.0001* | <0.0001* |
|                                                                          | Yes, occasionally.                  | 190(41.8) | 25.1(13.3)   |          |          |
|                                                                          | Yes, less than 90 minutes per week. | 27(5.9)   | 24.74(12.9)  |          |          |
|                                                                          | Yes, more than 90 minutes per week. | 94(20.7)  | 20.4(13.1)   |          |          |
|                                                                          | Total                               | 455(100)  |              |          |          |
| <b>How would you define the climate between you and your classmates?</b> | Friendly and relaxed.               | 256(56.3) | 23.2(13.32)  | <0.0001* | <0.0001* |
|                                                                          | Competitive and stimulating         | 32(7.0)   | 23.44(10.2)  |          |          |
|                                                                          | Competitive and hostile             | 29(6.4)   | 29.2(15.92)  |          |          |
|                                                                          | I don't have an opinion yet.        | 124(27.3) | 30.7(13.9)   |          |          |
|                                                                          | I don't have friends.               | 13(2.9)   | 29.8(12.5)   |          |          |
|                                                                          | Total                               | 454(99.8) |              |          |          |
| Missing                                                                  | 1(0.2)                              |           |              |          |          |

\*Indicates significance at p-value < 0.05.

## 232 Predictors of social anxiety disorder (SAD)

233 The multiple regression analysis aimed to predict Social Phobia Inventory (SPIN) scores  
234 based on six independent variables: gender, smoking status, previous failure in university,  
235 family history of mental health issues, exercise frequency, and type of relationships with  
236 classmates. The model significantly predicted SPIN scores ( $F(6, 447) = 13.165, p <$   
237  $0.001$ ), explaining 15% of the variance with an adjusted  $R^2$  of 14%. Gender, previous  
238 failures, family history, exercise, and relationships with classmates were all significant  
239 predictors, while smoking status was not. This indicates that gender, family history,  
240 exercise, and social relationships play important roles in the severity of social anxiety  
241 symptoms, whereas smoking does not have a statistically significant impact. (Table 3).

242 **Table 3, Predictors of Social anxiety disorder (SAD)**

| SPIN-Score        | B      | 95% CI for B |        | SE B  | Beta  | R2   | P     |
|-------------------|--------|--------------|--------|-------|-------|------|-------|
| Model             |        | Lower        | Upper  |       |       | .139 |       |
| Constant          | 26.975 | 24.531       | 29.420 | 1.244 |       |      | .000* |
| Gender            | -3.773 | -6.406       | -1.141 | 1.339 | -.136 |      | .005* |
| Smoking           | -.032  | -2.306       | 2.241  | 1.157 | -.001 |      | .978  |
| Previously Failed | 3.067  | -.050        | 6.185  | 1.586 | .085  |      | .054  |
| Family History    | 4.912  | 1.704        | 8.120  | 1.632 | .132  |      | .003* |
| Exercise          | -2.384 | -3.534       | -1.233 | .585  | -.187 |      | .000* |
| Classmates        | 1.942  | 1.081        | 2.804  | .438  | .197  |      | .000* |

243 Table 3: The multiple regression model. B= un-standardized regression coefficient, CI= confidence interval, SE B=  
244 Standard error of coefficient, Beta = Standardized coefficient, R2 = coefficient of determination

245 \*Indicates significance at p-value < 0.05

246

247

## 248 Factors relating to the presence/absence of social anxiety

### 249 disorder (SAD)

250 **Table 4** shows the results of the predictors for SAD according to the logistic regression  
251 model. The model shows females are found to have a higher probability of SAD  
252 compared to males (OR = 1.976, 95% CI = 1.209 – 3.228,  $p = 0.007$ ), individuals

253 engaging in more than 90 minutes of exercise per week are less likely to have SAD  
 254 compared to those who do not exercise (OR = 0.383, 95% CI = 0.207 - 0.708, p = 0.002).  
 255 Occasional smokers are shown to have a lower risk of SAD compared to non-smokers  
 256 (OR = 0.422, 95% CI = 0.183 - 0.973, p = 0.043). Furthermore, individuals who are  
 257 undecided about their relationships with classmates are at a higher risk of SAD compared  
 258 to those who perceive their relationships as friendly and relaxed (OR = 2.298, 95% CI =  
 259 1.367 - 3.865, p = 0.002).  
 260 The model was highly significant ( $\chi^2$  (29) = 69.934, p < 0.001) with good fit (Hosmer-  
 261 Lemeshow p = 0.800), explaining 19.4% (Nagelkerke R<sup>2</sup>) of variance in social phobia  
 262 and accurately classifying 68.4% of cases.

263 **Table 4, Factors relating to the presence/absence of social anxiety disorder (SAD)**

| Variable                            | OR     | 95% CI For B |       | P-value |
|-------------------------------------|--------|--------------|-------|---------|
|                                     |        | Lower        | Upper |         |
| <b>Gender</b>                       |        |              |       |         |
| Male                                | 1(ref) |              |       |         |
| Female                              | 1.976  | 1.209        | 3.228 | .007*   |
| <b>Monthly budget</b>               |        |              |       |         |
| Very low                            | 1(ref) |              |       | .646    |
| Low                                 | .826   | .396         | 1.722 | .610    |
| Average                             | .781   | .390         | 1.562 | .484    |
| Above average                       | .583   | .231         | 1.470 | .253    |
| High                                | .200   | .017         | 2.401 | .204    |
| <b>Do you smoke?</b>                |        |              |       |         |
| No                                  | 1(ref) |              |       | .101    |
| Occasionally                        | .422   | .183         | .973  | .043*   |
| Daily                               | 1.188  | .506         | 2.790 | .692    |
| <b>Studying field</b>               |        |              |       |         |
| Medical Field                       | 1(ref) |              |       | .517    |
| Engineering                         | 1.435  | .876         | 2.352 | .152    |
| Social Sciences                     | 1.053  | .566         | 1.959 | .871    |
| Natural Sciences                    | 1.476  | .269         | 8.092 | .654    |
| <b>GPA score</b>                    |        |              |       |         |
| Less than 2.5                       | 1(ref) |              |       | .532    |
| 2.5-2.9                             | 1.008  | .576         | 1.763 | .979    |
| 3.0-3.4                             | .819   | .453         | 1.478 | .506    |
| 3.5-4.0                             | .623   | .290         | 1.336 | .224    |
| <b>Family history</b>               |        |              |       |         |
| No, we don't.                       | 1(ref) |              |       |         |
| Yes, we have.                       | 1.488  | .803         | 2.757 | .207    |
| <b>Psychiatric medication</b>       |        |              |       |         |
| No                                  | 1(ref) |              |       |         |
| Yes                                 | 1.019  | .458         | 2.267 | .964    |
| <b>Turkish language proficiency</b> |        |              |       |         |
| Poor                                | 1(ref) |              |       | .399    |
| Fair                                | 1.518  | .571         | 4.031 | .403    |
| Good                                | 1.233  | .501         | 3.035 | .649    |
| Very good                           | .920   | .368         | 2.297 | .858    |
| <b>Whom do you live with?</b>       |        |              |       |         |
| Alone                               | 1(ref) |              |       | .537    |
| With Parents                        | 1.454  | .647         | 3.267 | .365    |

|                                     |        |       |        |       |
|-------------------------------------|--------|-------|--------|-------|
| With housemates                     | 1.544  | .655  | 3.639  | .321  |
| With relatives                      | .555   | .123  | 2.497  | .443  |
| In a dormitory                      | 1.525  | .675  | 3.448  | .311  |
| <b>Do you exercise?</b>             |        |       |        |       |
| No                                  | 1(ref) |       |        | .013* |
| Yes, occasionally.                  | .535   | .321  | .891   | .016* |
| Yes, less than 90 minutes per week. | .758   | .282  | 2.039  | .582  |
| Yes, more than 90 minutes per week. | .383   | .207  | .708   | .002* |
| <b>Classmates' relationship</b>     |        |       |        |       |
| Friendly and relaxed.               | 1(ref) |       |        | .009* |
| Competitive and stimulating         | 2.087  | .898  | 4.853  | .087  |
| Competitive and hostile             | 2.338  | .927  | 5.897  | .072  |
| I don't have an opinion yet.        | 2.298  | 1.367 | 3.865  | .002* |
| I don't have friends                | 2.630  | .643  | 10.755 | .178  |

264 Table 4: Logistic regression. OR = Odds ratio, 95% CI For B = 95% Confidence Interval for the coefficient (B)  
 265 \*Indicates significance at p-value < 0.05

## 266 Discussion

267 As Türkiye continues to attract foreign students from around the globe to pursue higher  
 268 education at its universities, a significant portion of this diverse group aims to engage  
 269 with the Turkish community. The country's geographical location and its system of  
 270 university entrance exams, along with its population diversity, make it a chosen  
 271 destination for foreign students. This study offers insights into this population of  
 272 undergraduate foreign students, assessing SAD among them and identifying several  
 273 factors that may be associated with the presence of SAD. As far as we know, no study  
 274 examined the incidence of SAD in this population. Given their immersion in a new  
 275 cultural environment, they encounter challenges in adaptation and language acquisition  
 276 that can affect their psychological and social health.

277  
 278 Our study demonstrates that approximately 60.8% of students experienced symptoms of  
 279 SAD. Among them, 4.2% experienced very severe symptoms, while about one-fifth  
 280 (11.6%) suffered from severe symptoms. Additionally, about two-thirds of students had  
 281 mild to moderate SAD symptoms (23.7% and 21.3%), respectively. In agreement with  
 282 our result, a study reported by Wejdan Al-Johani et al., which included medical students  
 283 in Saudi Arabia, found that the prevalence of SAD was almost 51%. Moreover, 8.21%  
 284 and 4.21% reported severe and very severe SAD, respectively [14]. Another study in  
 285 Saudi Arabia, conducted in 2020 by Al-Hazmi et al., had results that aligned with the  
 286 outcomes of our study. Using the same SPIN questionnaire we used, they found that

287 among 504 medical students, 13.5% of the participants experienced severe to very severe  
288 SAD symptoms [32].

289

290 Our study's current results indicate a higher prevalence of SAD compared to a previous  
291 study conducted in 2020 by Yared Reta et al. in Ethiopia. Their study found that the  
292 prevalence of SAD among 293 medicine and health science undergraduate students was  
293 32.8% [33]. Another study that included 523 university students in Sweden investigated  
294 the prevalence of SAD. The point prevalence of SAD among the participants was 16.1%  
295 [34]. In the United Kingdom, Graham Russell and Steve Shaw conducted research on  
296 students studying in higher education; the findings indicated that approximately 10% of  
297 students reported marked to severe SAD [35].

298

299 However, comparing our findings with those of the mentioned studies is challenging due  
300 to the diverse backgrounds of our participants. Our study focused on assessing the  
301 prevalence of SAD among foreign students from various faculties, representing different  
302 social factors and cultures. The study included participants from over 25 countries  
303 encompassing a wide range of university branches, unlike previous studies that were  
304 often limited to specific populations, such as medical students. Syrian students accounted  
305 for the majority of responses (59.6%). This outcome was expected as it represents the  
306 reality shaped by the civil war in Syria and its proximity to Türkiye, driving many Syrian  
307 individuals, particularly students, to pursue education in Türkiye. According to the data  
308 of the Council of Higher Education (YÖK) in Türkiye, in 2020, the total number of  
309 Syrian refugee students reached 37,236 [36]. It is crucial to consider that Syrian refugees  
310 in Türkiye experience symptoms of mental disorders such as anxiety, depression, and  
311 PTSD [37].

312 Moreover, our study revealed a significant association between tense relationships with  
313 classmates, the hostile social environment within the university, and the development of  
314 SAD. This observation underscores the challenges students face in integrating into  
315 Turkish society and forming supportive relationships to create an encouraging study  
316 environment. This is similar to the findings of Malecha et al., who examined the literature  
317 on foreign-born nursing students in the United States; their review reported that foreign-



318 born students face many difficulties in language and communication; barriers such as  
319 isolation, discrimination, and cultural differences also affect the educational experience  
320 [22]. According to a study by Rosellini and colleagues (2013), 78.8% of individuals with  
321 SAD were able to identify the presence of an acute or chronic stressor when their SAD  
322 first manifested; this finding aligns with our research, suggesting that exposure to acute  
323 stressors, such as a stressful university environment, may influence the development of  
324 SAD [38]. In cross-sectional studies, there is a consistent positive correlation between  
325 social anxiety and SAD diagnosis with increased levels of relational victimization and  
326 social exclusion. Additionally, these conditions are linked to having fewer friends and  
327 experiencing challenges in establishing new friendships, lower peer acceptance, more  
328 negative interactions within close friendships, as well as greater tendencies toward social  
329 avoidance and withdrawal [39-42].

330

331 The prevalence of SAD was higher in female participants compared to their male  
332 counterparts. This finding aligns with the DSM-5 statement that indicates that SAD is  
333 more frequent in women [43]. Consistent patterns emerged in a comprehensive study  
334 conducted by Dan J. Stein et al. wherein the analysis of data from 28 community surveys  
335 within the World Mental Health Survey Initiative similarly underscored a heightened  
336 prevalence of SAD among women [44]. Furthermore, other studies from diverse regions  
337 across the globe consistently reveal comparable results [14,45-47]. In a 2023 study  
338 conducted in Hong Kong, however, males showed higher rates of SAD than females; this  
339 contradicts results from other studies and can be explained by the acknowledged  
340 sampling size bias within the dataset, as the female sample was significantly larger than  
341 the male sample [48]. We can understand the higher frequency of SAD in women most  
342 effectively through a vulnerability-stress perspective. The notion revolves around the idea  
343 that varying exposure to psychosocial stressors, combined with increased susceptibility to  
344 anxiety in women, is put forward as a contributing factor to the identified sex differences  
345 in anxiety disorders [49].

346

347 In addition, our research revealed a favorable correlation between engaging in regular  
348 exercise and experiencing fewer symptoms of SAD. This result is in line with public

349 consensus and established scientific evidence supporting the positive influence of  
350 exercise on overall mental health, as well as its role in preventing and treating mental  
351 disorders [50-54]. The positive influence of exercise may be attributed to different  
352 mechanisms. Firstly, exercise could function as a diversion from negative thoughts.  
353 Additionally, repeated social interaction may play a role in this process. From a  
354 physiological perspective, engaging in physical activity can cause a reduction in cortisol,  
355 the stress hormone, potentially leading to an improvement in mood [55]. Also, studies  
356 propose that exercise not only fosters the growth of new nerve cells but also releases  
357 proteins like brain-derived neurotrophic factor, supporting the survival of nerve cells [56,  
358 57].

359

360 Another significant finding was the association between the prevalence of SAD and a  
361 family history of mental illness, with a one-half fold increase in the risk of SAD in people  
362 with positive family history. This finding aligns with a study conducted in Sweden by  
363 Maria Tillfors et al.; where they found that having an affected family member resulted in  
364 a two- to three-fold increase in the risk of SAD [58]. Furthermore, heredity has been  
365 identified as a predisposing factor for SAD, and genetic studies have provided strong  
366 evidence that at least some genetic component contributes to the development of the  
367 disorder [43, 59].

368

369 As shown in the results section, the occasional smokers had a mean SPIN score of 19.48,  
370 which is considered to have non to very mild social anxiety. This unexpected finding of the  
371 current study also is shown as a statistically significant inverse relationship between  
372 occasional smoking and social anxiety rates seen in our logistic regression model, with an  
373 odds ratio of 0.422. Several reasons could be suggested to explain this paradoxical  
374 discovery. To begin, it is possible that smoking on occasion acts as a coping tool for people  
375 who suffer from milder forms of social anxiety. In addition, the social situation in which  
376 occasional smoking happens may have an impact on social anxiety levels. Previous studies  
377 have revealed that smokers frequently smoke in social contexts to satisfy their desire for  
378 greater social engagement. This is a frequent condition in smokers with low nicotine  
379 dependence [60, 61]. Occasional smoking is frequently associated with social gatherings,

380 where people may feel more comfortable and at ease in the presence of others [62].  
381 However, both daily smokers and non-smokers experience mild social anxiety symptoms,  
382 with mean SPIN scores of 26.84 and 26.25, respectively. Yet, there is no statistically  
383 significant relation in our logistic regression model. Additional studies on this topic must  
384 be conducted to understand whether social anxiety is one of the reasons people start  
385 smoking.

386

387 As an expected finding, failing a year in college was found to be associated with mild social  
388 anxiety symptoms among international students. This finding highlights the specific  
389 obstacles that international students may encounter when navigating academic  
390 surroundings and transitioning to new social contexts, which leads to an increased  
391 vulnerability to social anxiety symptoms following academic losses.

392

## 393 **Limitations**

394 Our study, being a cross-sectional study, may not have the ability to establish strong  
395 conclusions regarding causation. Therefore, longitudinal studies with larger sample sizes  
396 are needed to determine other possible factors associated with SAD. Attempting to contact  
397 students through social media platforms restricts access to a subset of students,  
398 necessitating a comprehensive approach that ensures outreach for most international  
399 students. Additionally, the decision to design the questionnaire in Arabic and English  
400 excludes students who are not proficient in either language. Furthermore, our study's  
401 selection of explanatory variables was not all theoretically supported. Another limitation is  
402 the stigma surrounding mental illness among the students, which may prevent individuals  
403 from disclosing their condition.

404

## 405 **Conclusion and Recommendations**

406 Our study revealed a significantly high prevalence of SAD among foreign-born  
407 undergraduate students in Türkiye. Those with noticeable symptoms of SAD tended to be

408 female and have a family history of mental illnesses. Additionally, studying in a stressed  
409 atmosphere and experiencing failure were associated with a higher prevalence of SAD.  
410 Interestingly, those who smoked occasionally exhibited better symptoms of SAD. These  
411 findings necessitate more extra efforts in recognizing and treating SAD among this  
412 population and minimizing the negative consequences of adjusting to new life  
413 circumstances. This is crucial to protect the mental health of these students. Further research  
414 could explore, for instance, the prevalence of SAD among non-foreign-born and foreign-  
415 born students in Türkiye. Moreover, future studies could investigate the relationship  
416 between SAD and various variables, including the potential mediating effects of other  
417 factors on the experience of SAD.

## 418 **Acknowledgments**

419 We express our gratitude to all respondents who completed the questionnaire, as well as  
420 to the administrators of the international students' online groups and the international  
421 student associations, for their invaluable assistance in reaching our population.

## 422 **Supporting information**

423 **S1 Tool. Study questionnaire.**

424 (DOCX)

## 425 **References**

- 426
- 427 1. Penninx BW, Pine DS, Holmes EA, Reif A. Anxiety disorders. *Lancet* (London,  
428 England). 2021;397(10277):914–927. doi:10.1016/S0140-6736(21)00359-7.
  - 429 2. GBD 2016 Disease and Injury Incidence and Prevalence Collaborators. Global, regional,  
430 and national incidence, prevalence, and years lived with disability for 328 diseases and  
431 injuries for 195 countries, 1990–2016: a systematic analysis for the Global Burden of  
432 Disease Study 2016. *Lancet* (London, England). 2017;390(10100):1211–1259.  
433 doi:10.1016/S0140-6736(17)32154-2.
  - 434 3. Substance Abuse and Mental Health Services Administration. DSM-5 Changes:  
435 Implications for Child Serious Emotional Disturbance [Internet]. Rockville (MD):  
436 Substance Abuse and Mental Health Services Administration (US); 2016 Jun. PMID:  
30199184.

- 437  
438  
439  
440  
441  
442  
443  
444  
445  
446  
447  
448  
449  
450  
451  
452  
453  
454  
455  
456  
457  
458  
459  
460  
461  
462  
463  
464  
465  
466  
467  
468  
469  
470  
471  
472  
473  
474  
475  
476  
477  
478  
479  
480  
481  
482  
483  
484  
485  
486  
487  
488  
489  
490  
491  
492
4. Stein MB, Stein DJ. Social anxiety disorder. *Lancet* (London, England). 2008;371(9618):1115–1125. doi:10.1016/S0140-6736(08)60488-2.
  5. Steinert C, Hofmann M, Leichsenring F, Kruse J. What do we know today about the prospective long-term course of social anxiety disorder? A systematic literature review. *Journal of anxiety disorders*. 2013;27(7):692–702. doi:10.1016/j.janxdis.2013.08.002.
  6. Cox BJ, Fleet C, Stein MB. Self-criticism and social phobia in the US national comorbidity survey. *Journal of affective disorders*. 2004;82(2):227–234. doi:10.1016/j.jad.2003.12.012.
  7. Koban L, Schneider R, Ashar YK, Andrews-Hanna JR, Landy L, Moscovitch DA, et al. Social anxiety is characterized by biased learning about performance and the self. *Emotion* (Washington, D.C.). 2017;17(8):1144–1155. doi:10.1037/emo0000296.
  8. Acarturk C, de Graaf R, van Straten A, Have MT, Cuijpers P. Social phobia and number of social fears, and their association with comorbidity, health-related quality of life and help seeking: a population-based study. *Social psychiatry and psychiatric epidemiology*. 2008;43(4):273–279. doi:10.1007/s00127-008-0309-1.
  9. Leigh E, Chiu K, Clark DM. Is concentration an indirect link between social anxiety and educational achievement in adolescents? *PloS one*. 2021;16(5):e0249952. doi:10.1371/journal.pone.0249952.
  10. Hajure M, Abdu Z. Social Phobia and Its Impact on Quality of Life Among Regular Undergraduate Students of Mettu University, Mettu, Ethiopia. *Adolesc Health Med Ther*. 2020 Jun 18;11:79-87. doi: 10.2147/AHMT.S254002.
  11. Desalegn GT, Getinet W, Tadie G. The prevalence and correlates of social phobia among undergraduate health science students in Gondar, Gondar Ethiopia. *BMC Res Notes*. 2019;12:438. doi:10.1186/s13104-019-4482-y
  12. Waghachavare VB, Quraishi SR, Dhumale GB, Gore AD. A Cross-sectional Study of Correlation of Body Image Anxiety with Social Phobia and Their Association with Depression in the Adolescents from a Rural Area of Sangli District in India. *Int J Prev Med*. 2014 Dec;5(12):1626-9.
  13. Alsibani F, Al Hashmi I, Al-Anqoodi R, Al-Badi M. Social Phobia in Undergraduate University Students in Oman. *Hunan Daxue Xuebao/Journal of Hunan University Natural Sciences*. 2022;49. doi:10.55463/issn.1674-2974.49.3.24.
  14. Al-Johani WM, AlShamlan NA, AlAmer NA, et al. Social anxiety disorder and its associated factors: a cross-sectional study among medical students, Saudi Arabia. *BMC Psychiatry*. 2022;22:505. doi:10.1186/s12888-022-04147-z
  15. Hutchesson MJ, Duncan MJ, Oftedal S, Ashton LM, Oldmeadow C, Kay-Lambkin F, Whatnall MC. Latent Class Analysis of Multiple Health Risk Behaviors among Australian University Students and Associations with Psychological Distress. *Nutrients*. 2021;13(2):425. doi:10.3390/nu13020425
  16. Yeh C, Inose M. International students reported English fluency, social support satisfaction, and social connectedness as predictors of acculturative stress. *Counseling Psychology Quarterly*. 2003;16:15–28. doi:10.1080/0951507031000114058.
  17. McCabe L. Mental health and study abroad: Responding to the concern. Washington: Association of International Educators; c2005 [cited Feb 27]. Available from:<https://www.nafsa.org/sites/default/files/ektron/files/underscore/InternationalEducator/EducationAbroadNovDec05.pdf>
  18. Mikulas J, Jitka S. Statistical analysis of study abroad experiences of international students in five major host countries of Europe. *Journal of International Students*. 2019;9:1–18. doi:10.32674/jis.v9i1.262
  19. Wang C, Mallinckrodt B. Acculturation, attachment, and psychosocial adjustment of Chinese/Taiwanese international students. *Journal of Counseling Psychology*. 2006;53:422–433. doi:10.1037/0022-0167.53.4.422
  20. Lucas J. Over-stressed, overwhelmed, and over here: Resident directors and the challenges of student mental health abroad. *Frontiers: The Interdisciplinary Journal of Study Abroad*. 2009;18:187–216.
  21. Pan JY, Wong DF, Joubert L, Chan CL. The protective function of meaning of life on life satisfaction among Chinese students in Australia and Hong Kong: a cross-cultural

- 493 comparative study. *Journal of American college health: J of ACH*. 2008;57(2):221–231.  
494 doi:10.3200/JACH.57.2.221-232
- 495 22. Malecha A, Tart K, Junious DL. Foreign-born nursing students in the United States: a  
496 literature review. *J Prof Nurs*. 2012 Sep-Oct;28(5):297-305.  
497 doi:10.1016/j.profnurs.2012.03.001. PMID: 23006652.
- 498 23. Yükseköğretim Kurulu(YÖK). ÜNİVERSİTE İZLEME VE DEĞERLENDİRME  
499 GENEL RAPORU – 2023. [cited 2023 September 11]. Available from:  
500 <https://www.yok.gov.tr/yayinlar/yayinlarimiz>
- 501 24. Gültekin BK, Dereboy IF. The prevalence of social phobia, and its impact on quality of  
502 life, academic achievement, and identity formation in university students. *Turk Psikiyatri*  
503 *Derg*. 2011 Fall;22(3):150-8.
- 504 25. Izzıç F, Akyüz G, Doğan O, Kuğu N. Social phobia among university students and its  
505 relation to self-esteem and body image. *Can J Psychiatry*. 2004 Sep;49(9):630-4. doi:  
506 10.1177/070674370404900910.
- 507 26. Köksal B, Topkaya N. Üniversite öğrencilerinin yaşadığı sorunlar ve sorun alanlarının  
508 depresyon, anksiyete ve stresle ilişkisi. *TEBD*. 2021;19(2):926-949.  
509 doi:10.37217/tebd.933931.
- 510 27. Snoubar Y. Türkiye’de Öğrenim Gören Uluslararası Öğrencilerin Sorunları ve Sosyal  
511 Hizmet Gereksinimleri. [Doctoral Thesis]. Hacettepe Üniversitesi Sosyal Bilimler  
512 Enstitüsü; 2015.
- 513 28. udef.org.tr [Internet]. Federation of International Students Associations; [cited 2024 Feb  
514 26 ]. Available from:<https://udef.org.tr/uluslararası-ogrencilik/>
- 515 29. Connor KM, Davidson JR, Churchill LE, Sherwood A, Foa E, Weisler RH:  
516 Psychometric properties of the Social Phobia Inventory (SPIN). New self-rating scale.  
517 *Br J Psychiatry* 2000, 176:379-386.
- 518 30. Sfeir M, Saliba G, Akel M, Hallit S, Obeid S: Association between perfectionism and  
519 life satisfaction among a sample of the Lebanese population: The indirect role of social  
520 phobia and validation of the Arabic version of the Social Phobia Inventory. *Perspect*  
521 *Psychiatr Care* 2022, 58(4):2513-2523.
- 522 31. T.C. Sağlık Bilimleri Üniversitesi. (n.d.). Hamidiye Bilimsel Araştırmalar Etik Kurulu.  
523 [Cited 2024, Feb 11] Available from: [https://www.sbu.edu.tr/tr/arastirma/etik-](https://www.sbu.edu.tr/tr/arastirma/etik-kurullar/hamidiye-bilimsel-arastirmalar-etik-kurulu)  
524 [kurullar/hamidiye-bilimsel-arastirmalar-etik-kurulu](https://www.sbu.edu.tr/tr/arastirma/etik-kurullar/hamidiye-bilimsel-arastirmalar-etik-kurulu)
- 525 32. Al-Hazmi BH, Sabur SS, Al-Hazmi RH. Social anxiety disorder in medical students at  
526 Taibah University, Saudi Arabia. *J Family Med Prim Care*. 2020;9(8):4329
- 527 33. Reta Y, Ayalew M, Yeneabat T, Bedaso A. Social Anxiety Disorder Among  
528 Undergraduate Students of Hawassa University, College of Medicine and Health  
529 Sciences, Ethiopia. *Neuropsychiatr Dis Treat*. 2020 Feb 26;16:571-577. doi:  
530 10.2147/NDT.S235416. PMID: 32161462; PMCID: PMC7049747.
- 531 34. Tillfors M, Furmark T. Social phobia in Swedish university students: prevalence,  
532 subgroups and avoidant behavior. *Soc Psychiatry Psychiatr Epidemiol*. 2007  
533 Jan;42(1):79-86. doi: 10.1007/s00127-006-0143-2. Epub 2006 Dec 11. PMID: 17160591.
- 534 35. Russell G, Shaw S. A study to investigate the prevalence of social anxiety in a sample of  
535 higher education students in the United Kingdom. *J Ment Health*. 2009;18(3):198–206.  
536 doi:10.1080/09638230802522494
- 537 36. Acarturk C, McGrath M, Roberts B, et al. Prevalence and predictors of common mental  
538 disorders among Syrian refugees in Istanbul, Turkey: a cross-sectional study. *Soc*  
539 *Psychiatry Psychiatr Epidemiol*. 2021;56:475-484. doi:10.1007/s00127-020-01941-6.
- 540 37. Metin S, Ekinci F, Taş TA, Kutlu TR. The Living Conditions and Psychosocial  
541 Circumstances of Syrian Refugees Who Migrated from Their Country After War: The  
542 Example of Bursa City. *Karya Journal of Health Science*. 2022;3(2):140-144. doi:  
543 10.52831/kjhs.1142534.
- 544 38. Rosellini A, Rutter L, Bourgeois M, Emmert-Aronson B, Brown T. The relevance of age  
545 of onset to the psychopathology of social phobia. *Journal of Psychopathology and*  
546 *Behavioural Assessment*. 2013;35:356–365.

- 547  
548  
549  
550  
551  
552  
553  
554  
555  
556  
557  
558  
559  
560  
561  
562  
563  
564  
565  
566  
567  
568  
569  
570  
571  
572  
573  
574  
575  
576  
577  
578  
579  
580  
581  
582  
583  
584  
585  
586  
587  
588  
589  
590  
591  
592  
593  
594  
595  
596  
597  
598  
599  
600  
601
39. Beidel DC, Turner SM. Shy children, phobic adults: The nature and treatment of social anxiety disorder (2nd ed.). Washington, DC: American Psychological Association; 2007.
  40. Boulton M. Associations between adults' recalled childhood bullying victimization, current social anxiety, coping, and self-blame: Evidence for moderation and indirect effects. *Anxiety, Stress, & Coping*. 2013;26:270-292.
  41. Dempsey AG, Storch EA. Relational victimization: The association between recalled adolescent social experiences and emotional adjustment in early adulthood. *Psychology in the Schools*. 2008;45(4):310-322. doi:10.1002/pits.20298.
  42. Erath SA, Flanagan K, Bierman K. Social anxiety and peer relations in early adolescence: Behavioral and cognitive factors. *Journal of Abnormal Child Psychology*. 2007;35:405-416.
  43. Diagnostic and Statistical Manual of Mental Disorders, Fifth Edition. Arlington, VA, American Psychiatric Association, 2013.
  44. Stein DJ, Lim CCW, Roest AM, et al. The cross-national epidemiology of social anxiety disorder: Data from the World Mental Health Survey Initiative. *BMC Med*. 2017;15:143. doi:10.1186/s12916-017-0889-2.
  45. MacKenzie MB, Fowler KF. Social anxiety disorder in the Canadian population: Exploring gender differences in sociodemographic profile. *Journal of Anxiety Disorders*. 2013;27(4):427-434. doi:10.1016/j.janxdis.2013.05.006.
  46. Asher M, Aderka IM. Gender differences in social anxiety disorder. *Journal of Clinical Psychology*. 2018;74(10):1730-1741. doi:10.1002/jclp.22624.
  47. Kupper N, Denollet J. Social anxiety in the general population: introducing abbreviated versions of SIAS and SPS. *Journal of affective disorders*. 2012;136(1-2):90-98. doi:10.1016/j.jad.2011.08.014.
  48. Ganotice FA Jr, Shen X, Yuen JKY, Chow YMA, Wong AMY, Chan KMK, et al. Students' interaction anxiety and social phobia in interprofessional education in Hong Kong: mapping a new research direction. *Annals of medicine*. 2023;55(1):2210842. doi:10.1080/07853890.2023.2210842.
  49. Hallers-Haalboom ET, Maas J, Kunst LE, Bekker MH. The role of sex and gender in anxiety disorders: Being scared "like a girl"? *Handb Clin Neurol*. 2020;1(175):359-68.
  50. Aylett E, Small N, Bower P. Exercise in the treatment of clinical anxiety in general practice - a systematic review and meta-analysis. *BMC health services research*. 2018;18(1):559. doi:10.1186/s12913-018-3313-5.
  51. Silva LAD, Tortelli L, Motta J, Menguer L, Mariano S, Tasca G, et al. Effects of aquatic exercise on mental health, functional autonomy and oxidative stress in depressed elderly individuals: A randomized clinical trial. *Clinics (Sao Paulo, Brazil)*. 2019;74:e322. doi:10.6061/clinics/2019/e322.
  52. López-Torres Hidalgo J, DEP-EXERCISE Group. Effectiveness of physical exercise in the treatment of depression in older adults as an alternative to antidepressant drugs in primary care. *BMC psychiatry*. 2019;19(1):21. doi:10.1186/s12888-018-1982-6.
  53. Smith PJ, Merwin RM. The Role of Exercise in Management of Mental Health Disorders: An Integrative Review. *Annual review of medicine*. 2021;72:45-62. doi:10.1146/annurev-med-060619-022943.
  54. Gordon BR, McDowell CP, Lyons M, Herring MP. The Effects of Resistance Exercise Training on Anxiety: A Meta-Analysis and Meta-Regression Analysis of Randomized Controlled Trials. *Sports medicine (Auckland, N.Z.)*. 2017;47(12):2521-2532. doi:10.1007/s40279-017-0769-0.
  55. Duclos M, Gouarne C, Bonnemaïson D. Acute and chronic effects of exercise on tissue sensitivity to glucocorticoids. *Journal of applied physiology*. 2003;94(3):869-875.
  56. Cotman CW, Berchtold NC. Exercise: a behavioral intervention to enhance brain health and plasticity. *Trends in neurosciences*. 2002;25(6):295-301.
  57. Ernst C, Olson AK, Pineda JP, Lam RW, Christie BR. Antidepressant effects of exercise: evidence for an adult-neurogenesis hypothesis?. *Journal of Psychiatry and Neuroscience*. 2006;31(2):84-92.

- 602  
603  
604  
605  
606  
607  
608  
609  
610  
611  
612  
613  
614  
615  
616
58. Tillfors M, Furmark T, Ekselius L, Fredrikson M. Social phobia and avoidant personality disorder as related to parental history of social anxiety: a general population study. *Behaviour Research and Therapy*. 2001;39(3):781-790.
  59. Sadock BJ, Sadock VA, Ruiz P. *Synopsis of Psychiatry: Behavioral Sciences, Clinical Psychiatry*. Wolters Kluwer; 2015. 2.
  60. Bondy SJ, Victor JC, Diemert LM, Mecredy GC, Chaiton M, Brown KS, Cohen JE, McDonald PW, Ferrence R, Garcia JM, et al. Transitions in smoking status over time in a population-based panel study of smokers. *Nicotine Tob Res*. 2013;15:1201-1210. doi: 10.1093/ntr/nts259.
  61. Lisha NE, Delucchi KL, Ling PM, Ramo DE. Prevalence and correlates of social smoking in young adults: Comparisons of behavioral and self-identified definitions. *Nicotine Tob Res*. 2015;17:1076-1084. doi: 10.1093/ntr/ntu242.
  62. Schane RE, Glantz SA, Ling PM. Nondaily and social smoking: An increasingly prevalent pattern. *Arch Intern Med*. 2009;169:1742-1744. doi: 10.1001/archinternmed.2009.315.



## Distribution of Participants by Social Anxiety Disorder (SAD) Categories

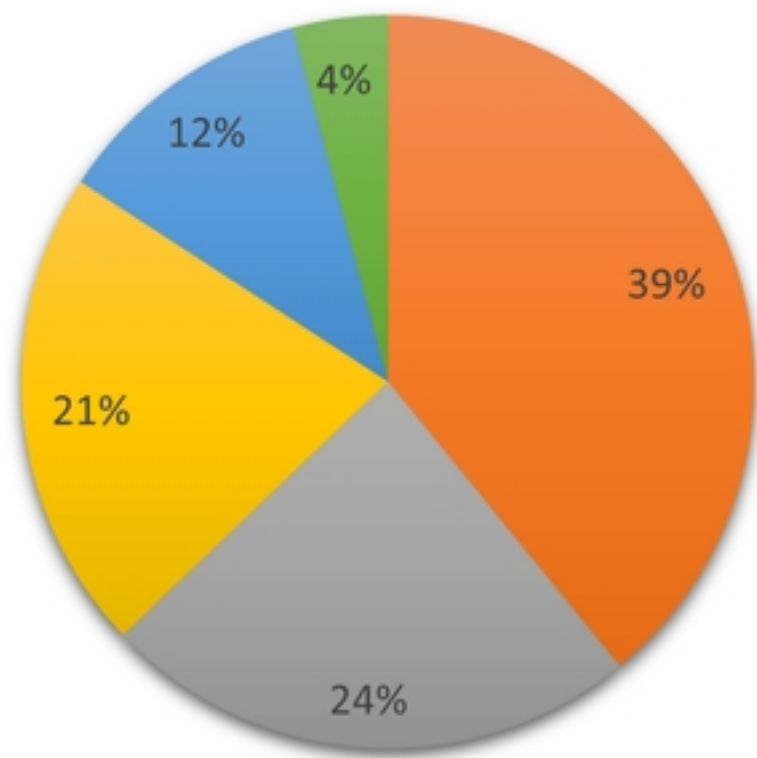

■ none or very mild (less than 20) ■ Mild (21-30) ■ Moderate (31-40) ■ Severe (41-50) ■ Very severe (51 or more)

Fig 1. Prevalence of SPIN categories.
